# Supplementary material for: Synergistic behaviour of ZnO nanoparticles and gemini surfactants on the dynamic and equilibrium oil/water interfacial tension
Source: Royal Society of Chemistry journal article supplement (doi:10.1039/c5cp00510h), 2015-01-01
Supplement: c5cp00510h1.pdf [file c5cp00510h1.pdf]

Supplementary Information

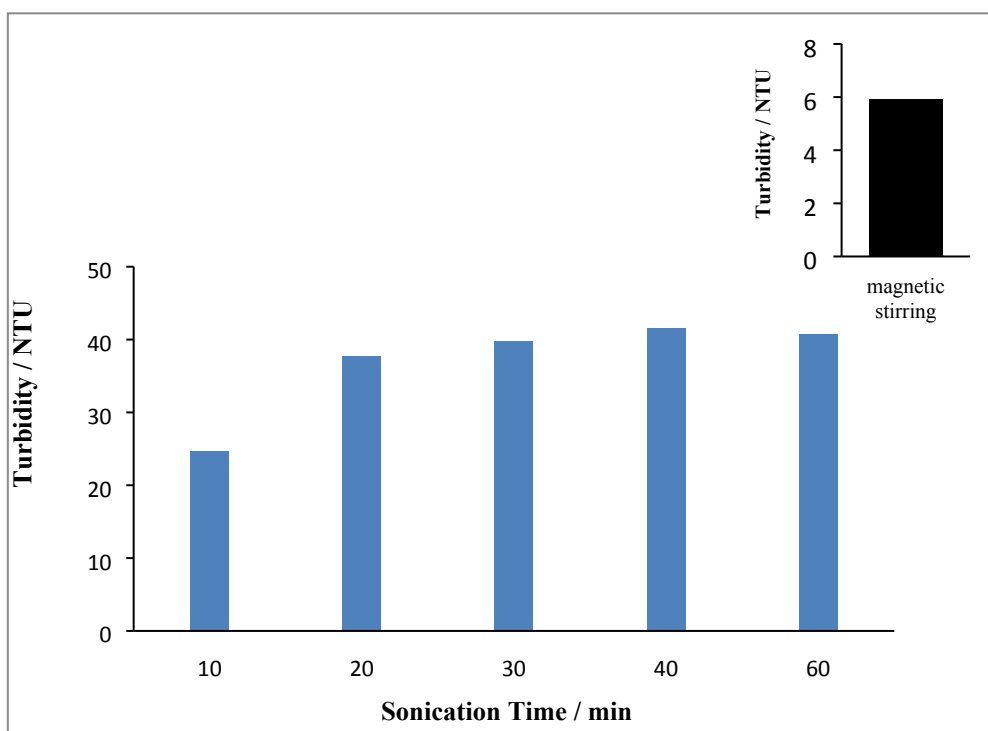

**Figure S1.** Plots of turbidity of dispersion ZnO in the aqueous phase versus sonication time, inset figure shows: turbidity after 40 min magnetic stirring.

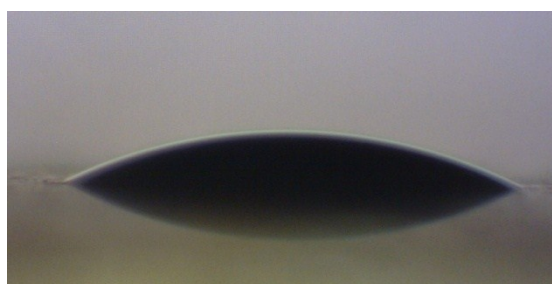

**Figure S2.** The images of water drop on the surface of ZnO nanoparticles thin film.

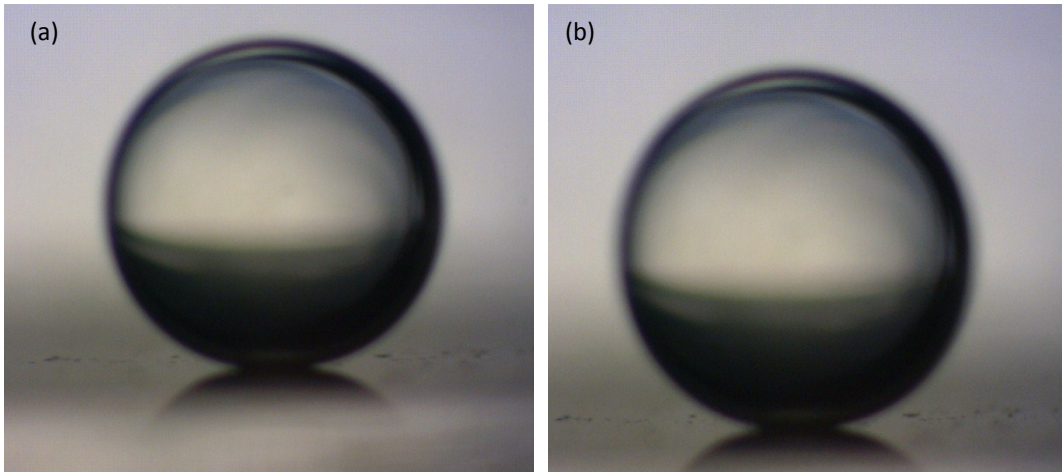

**Figure S3.** The images of water drop covered by n-decane at a quartz substrate in the absence (a) and presence of ZnO nanoparticles.

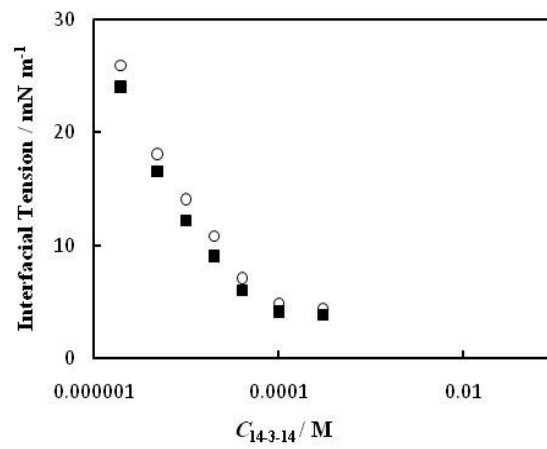

**Figure. S4** The equilibrium interfacial tension of aqueous 14-3-14 solution /n-decane vs. surfactant concentration in the absence ○, and presence ■ of 0.01 wt% ZnO nanoparticles at 25 °C.

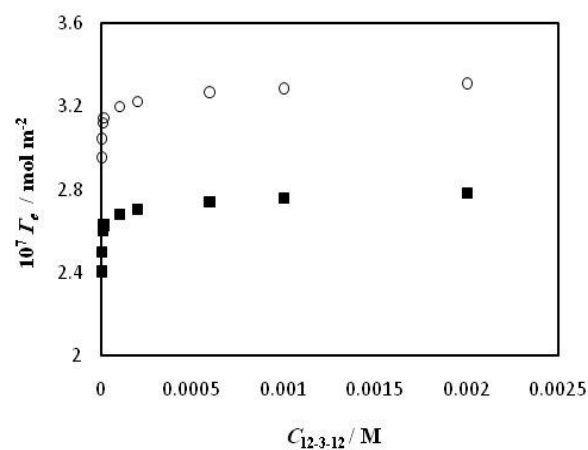

**Figure S5.** Equilibrium surface concentration vs. 12-3-12 bulk concentration in the absence  $\circ$  and presence  $\blacksquare$  of 0.01 wt% ZnO nanoparticles at 25 °C.

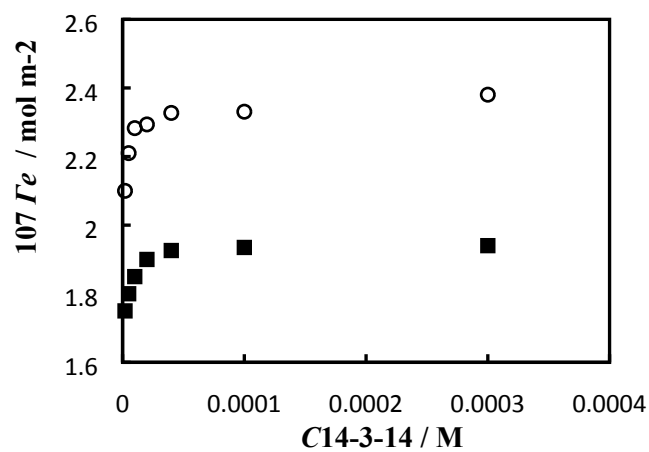

**Figure S6.** Equilibrium surface concentration vs. 14-3-14 bulk concentration in the absence  $\circ$  and presence  $\blacksquare$  of 0.01 wt% ZnO nanoparticles at 25 °C.

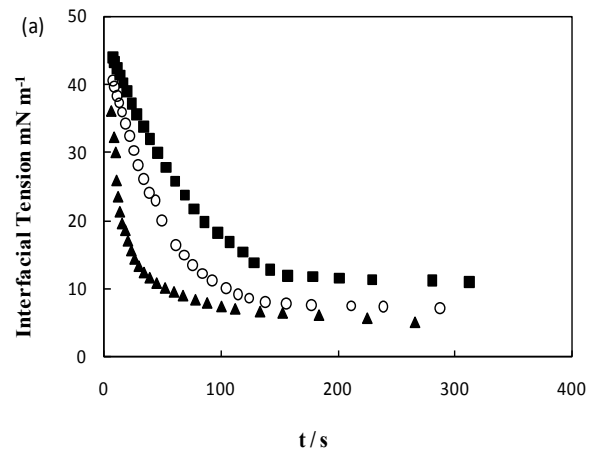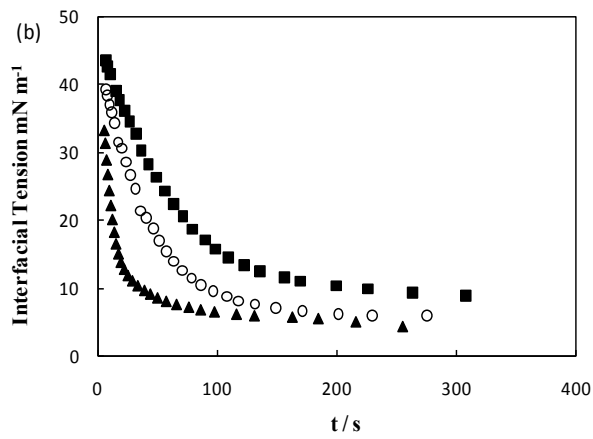

**Figure S7.** The dynamic interfacial tension of 14-3-14 aqueous solution / n-decane vs. time at 25 °C and at different SDS concentrations; 0.00002 ■, 0.00004 ○, 0.0001 ▲, M. (a) in the absence and (b) in the presence of 0.01 wt% ZnO nanoparticles.

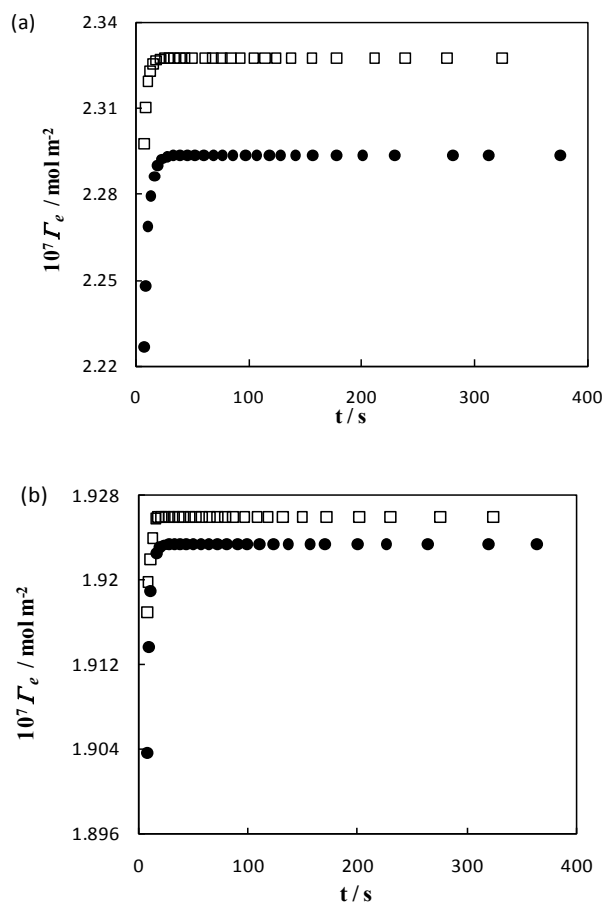

**Figure S8.** Dynamic surface concentration vs. time at different 14-3-14 concentrations, 0.000006  $\square$  and 0.00004  $\bullet$  M. (a) in the absence and (b) in the presence of 0.01 wt% ZnO nanoparticles at 25 °C.

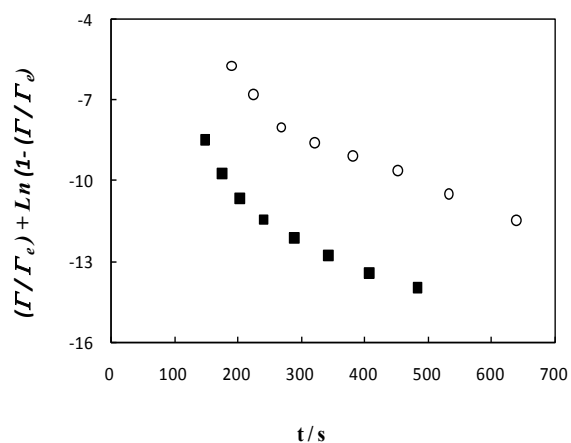

**Figure S9.** The plot of  $\frac{\Gamma}{\Gamma_e} + \ln\left(1 - \frac{\Gamma}{\Gamma_e}\right)$  vs. time close to equilibrium for 0.00001 M 12-3-12 concentration, in the absence

$\circ$  and in the presence  $\blacksquare$  of 0.01 wt% ZnO nanoparticles at 25 °C.

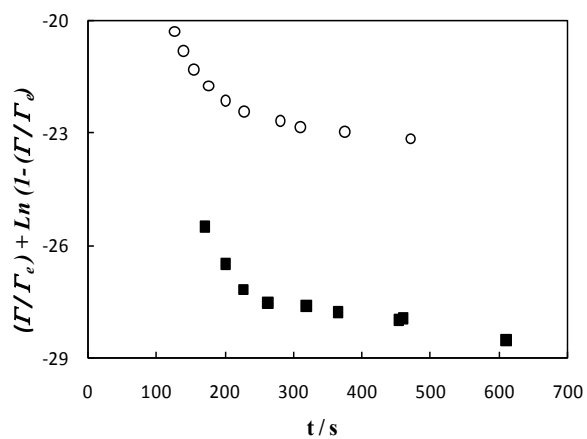

**Figure S10.** The plot of  $\frac{\Gamma}{\Gamma_e} + \ln\left(1 - \frac{\Gamma}{\Gamma_e}\right)$  vs. time close to equilibrium for 0.00002 M 14-3-14 concentration, in the absence  $\circ$  and in the presence  $\blacksquare$  of 0.01 wt% ZnO nanoparticles at 25 °C.

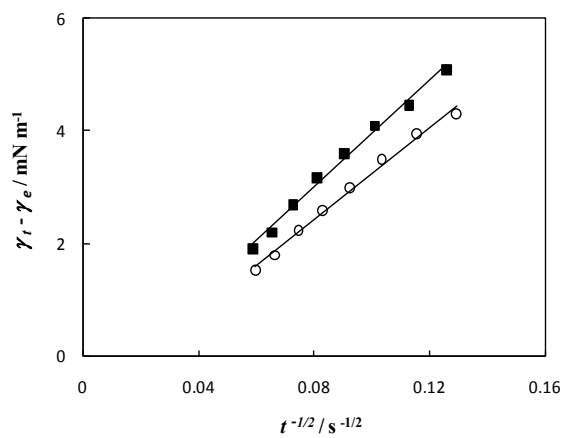

**Figure S11.** Plot of  $\gamma(t)_{t \rightarrow \infty} - \gamma_e$  vs.  $t^{-1/2}$  for close to equilibrium data at 0.000004, M of 14-3-14, in the absence  $\circ$  and presence  $\blacksquare$  of 0.01 wt% ZnO nanoparticles at 25 °C.

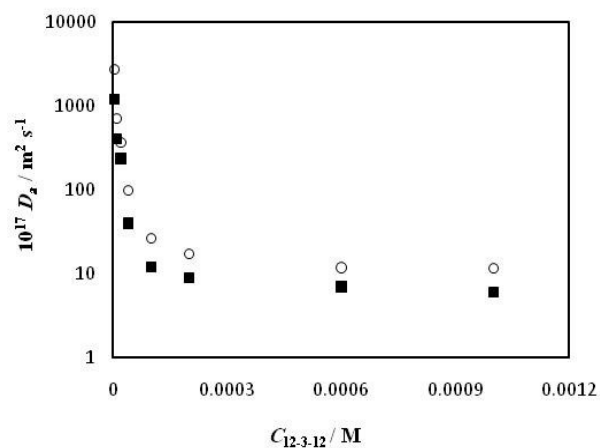

**Figure S12.** Apparent diffusion coefficient  $D_a$  as a function of 12-3-12 bulk concentration in the absence  $\circ$  and presence  $\blacksquare$  of ZnO nanoparticles at 25 °C.

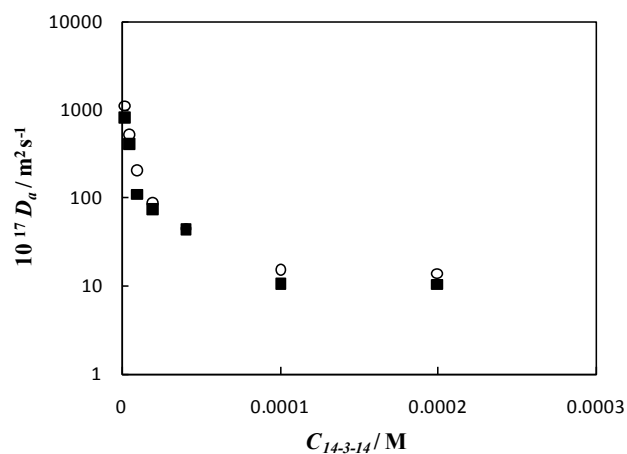

**Figure S13.** Apparent diffusion coefficient  $D_a$  as a function of 14-3-14 bulk concentration in the absence  $\circ$  and presence  $\blacksquare$  of ZnO nanoparticles at 25 °C.

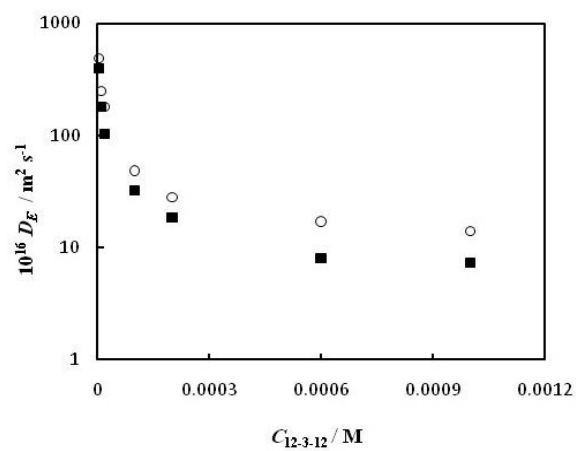

**Figure S14.** Effective diffusion coefficient  $D_E$  as a function of 12-3-12 bulk concentration in the absence  $\circ$  and presence  $\blacksquare$  of ZnO nanoparticles at 25 °C.

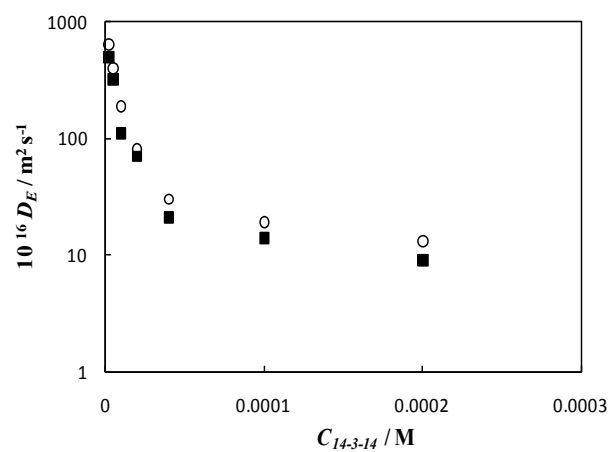

**Figure S15.** Effective diffusion coefficient  $D_E$  as a function of 14-3-14 bulk concentration in the absence  $\circ$  and presence  $\blacksquare$  of ZnO nanoparticles at 25 °C.

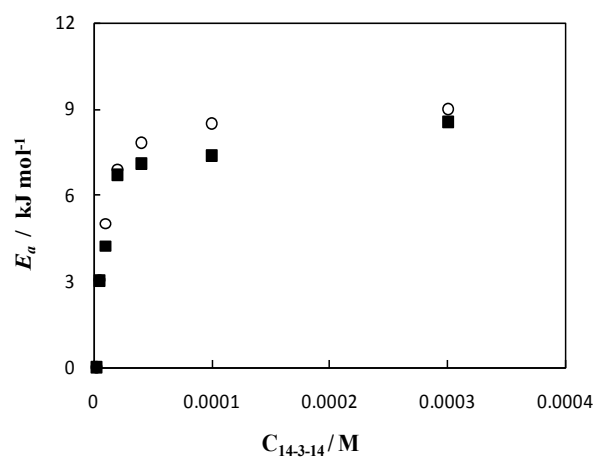

**Figure S16.** Activation energy of adsorption,  $E_a$ , as a function of 14-3-14 bulk concentration in the absence  $\circ$  and presence  $\blacksquare$  of ZnO nanoparticles at 25 °C.



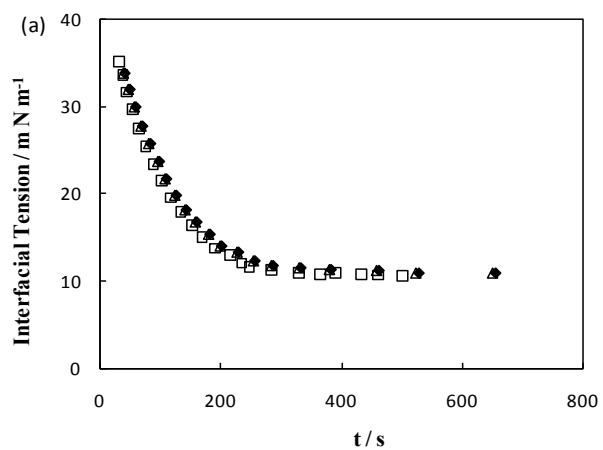

**Figure S17.** Effect of solution pH on the dynamic interfacial tension for  $C_{14-3-14}=0.000015$  M, pH=5.5  $\Delta$ , pH=7  $\circ$  and pH=9.5  $\blacklozenge$  (a) in the absence and (b) in the presence of 0.01 wt% ZnO nanoparticles at 25 °C.

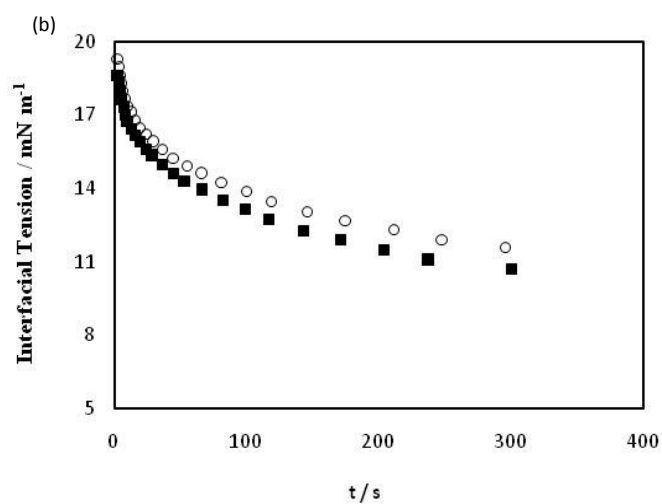

**Figure S18.** Dynamic interfacial tension of 12-3-12 surfactant aqueous solution / n-decane vs. time in the 0.005  $\circ$  and 0.01  $\blacksquare$  wt% of ZnO nanoparticles at 25 °C.

(a)

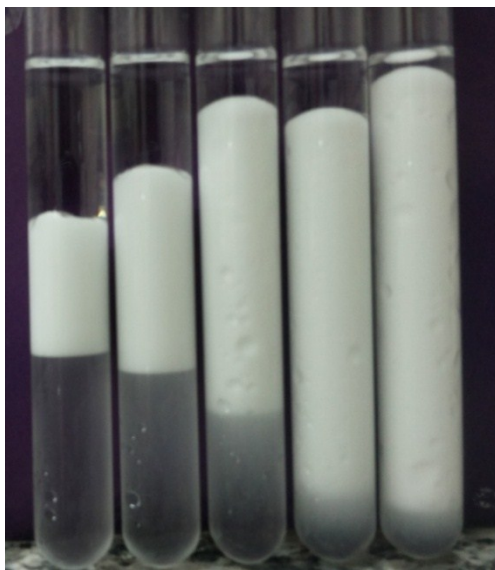

(b)

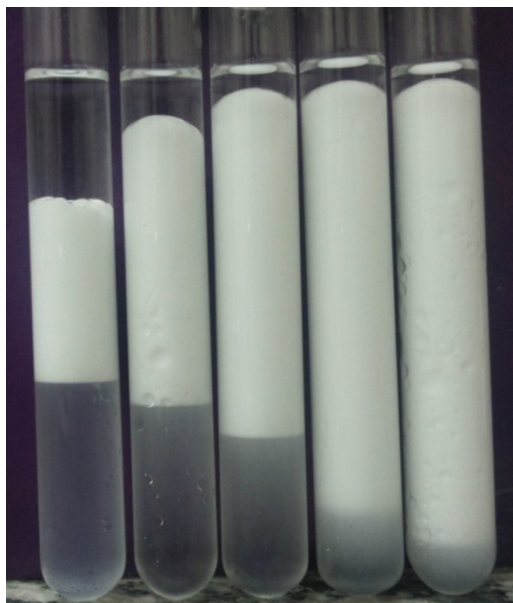

**Figure S19.** Photograph of vessels containing emulsions of decane and water (1:1) stabilized by (a) 14-3-14 surfactant alone at concentrations of 0.00001, 0.00004, 0.00008, 0.0001 and 0.0002 M (left to right). (b) A fixed concentration of ZnO nanoparticles (0.01 wt %) and 12-3-12 with the same concentrations of (a).

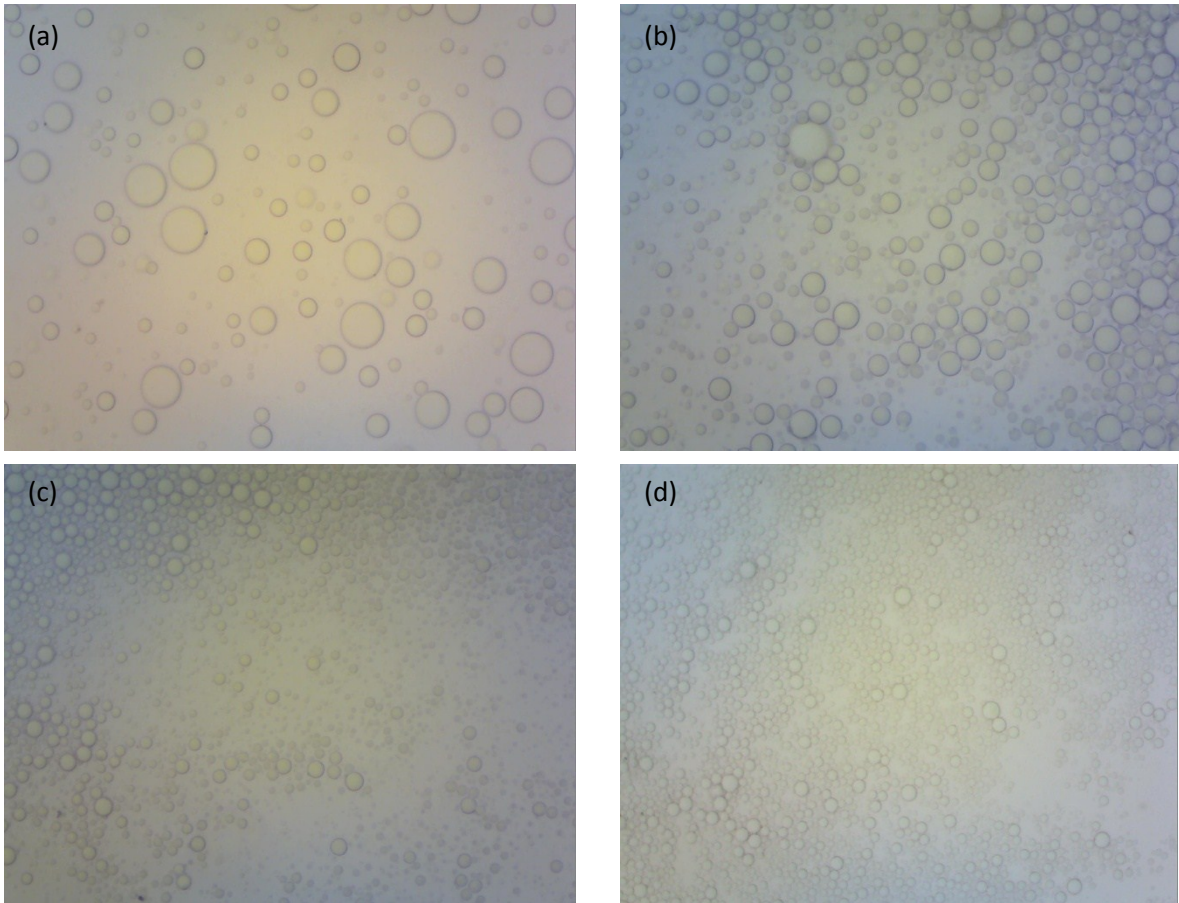

**Figure S20.** Optical microscopy image of n-decane-in-water emulsions (1:1) stabilized by (a) 0.00001 M 14-3-14 alone, and mixture of 0.01 wt % ZnO particles, and (b) 0.00001, (c) 0.0001, and (d) 0.001 M 14-3-14. With  $\times 400$  magnification.
